# Supplementary material
Source: publisher figshare collection journal article supplement (https://gsajournals.figshare.com/articles/dataset/_/11983857)
Supplement: Supplementary file 1 [file 3]

1            Semi-parametric neighborhood selection for  
2                    estimating linear and non-linear gene  
3                            co-expression networks

4            Juho A. J. Kontio, Marko J. Rinta-aho and Mikko J. Sillanpää

5                            Supplement A

6    **1    The role of parameters  $\gamma$  and  $\alpha$  on the esti-**  
7            **mated non-linear neighborhood structures**

Let us evaluate the robustness of the SNS procedure with respect to the values of the elastic net estimator parameter  $\alpha$  (Zou and Hastie 2005) and the kernel parameter  $\gamma$  in the PH-E model (see the model (14) in the article). We go through all possible  $(\gamma, \alpha)$  combinations using the following sparse grids:

$$\alpha \in \{1/3, 2/3, 1\} \quad \text{and} \quad \gamma \in \{1/5, 1, 2\}.$$

The same simulated datasets and replicates are used as in the second example analysis in the article (replicates are available in the supplementary materials B). The simulation was proceeded such that a real protein expression dataset provided by DREAM9 challenge (Noren *et al.* 2016) was used as a basis dataset. This dataset consists of measurements of 231 proteins ( $X_1, X_2, \dots, X_{231}$ ) over 191 individuals diagnosed with acute myeloid leukemia. Subsequently, ten replicates of six new proteins ( $Z_1, Z_2, Z_3, Z_4, Z_5$ ) were simulated on top of these 231 proteins such that

$$\begin{aligned} Z_1 &= X_5 + \cos(X_{100}) + \mathcal{N}(0, 0.6^2), & Z_2 &= X_{15} + X_{47}^2 + \mathcal{N}(0, 1^2), \\ Z_3 &= X_{25} + X_{80}X_{110} + \mathcal{N}(0, 1.5^2), & Z_4 &= X_{30} + X_{200}^3 + \mathcal{N}(0, 3^2), \\ Z_5 &= X_{35} + X_{40} + X_{50} + X_8X_{150}X_{220} + \mathcal{N}(0, 0.6^2). \end{aligned}$$

8    As reported in the article, the average proportions of signal variations on the  
9    overall variations were 0.73, 0.62, 0.41, 0.36 and 0.90 for the new simulated  
10    proteins  $Z_1, Z_2, Z_3, Z_4$  and  $Z_5$  over the replicates (calculated as  $(\text{var}(Z_k) -$   
11     $\varepsilon_k^2)/\text{var}(Z_k)$  separately for each  $k = 1, \dots, 5$ ).

12    In the forthcoming examples, we only consider and estimate the neighbor-  
13    hoods of simulated proteins ( $Z_1, Z_2, Z_3, Z_4, Z_5$ ) for which the true underlying  
14    structures are fully known. The results of the analyses are averaged over the  
15    replicates. Moreover, despite some linear regulatory effects were simulated we

16 are considering only the non-linear relationships since identifying the linear  
 17 neighborhoods in these examples would be a relatively simple task. The lin-  
 18 ear relationships are only included to show how different outcomes in the linear  
 19 step (e.g. resulted by different  $(\gamma, \alpha)$  pairs) affect to the results of the non-linear  
 20 neighborhood selection. Thus, we compute the receiver operating character-  
 21 istics (ROC) curves with respect to the neighborhoods of simulated proteins  
 22  $(Z_1, Z_2, Z_3, Z_4, Z_5)$  and compare the areas under the ROC curves (AUCs) re-  
 23 sulted by different parameter pairs  $(\gamma, \alpha)$ .

24 The estimation of linear and non-linear neighborhoods is done with the *glm-*  
 25 *net* R-package (Friedman *et al.* 2010) in accordance to the article. For each  
 26 pair  $(\gamma, \alpha)$ , the penalty parameter  $\lambda_{1,k}$  and  $\lambda_{2,k}$  values are chosen for the linear  
 27  $(\lambda_{1,k})$  and non-linear  $(\lambda_{2,k})$  neighborhood selection steps by the cross-validation  
 28 (CV) criterion in each replicate.

29 A hard-thresholding procedure is applied to calculate truncated and non-  
 30 truncated areas AUCs from the estimated non-linear neighborhoods (given by  
 31 CV based values  $\lambda_{1,k}$  and  $\lambda_{2,k}$ ). Table S1 displays the non-truncated and trun-  
 32 cated (at 0.10 and 0.40 false-positive rates) AUCs averaged over the replications  
 33 for each parameter pair  $(\gamma, \alpha)$ . Note that the  $\alpha$  parameter can be different for  
 34 linear and non-linear neighborhood selection steps that are later separated with  
 35 symbols  $\alpha_1$  (linear) and  $\alpha_2$  (non-linear). However, the results presented in Table  
 36 S1 are produced using the same values for  $\alpha_1$  and  $\alpha_2$  that are simultaneously  
 37 denoted by  $\alpha$ .

Table S1: Averaged areas under the truncated and non-truncated ROC curves (AUCs) for the SNS procedure with different parameter pairs  $(\gamma, \alpha)$  over ten replicates in the simulated scenarios. Truncation points are set to 0.10 and 0.40 false-positive rates and shown in brackets above each corresponding column. The same  $\alpha$  parameter value is used for linear and non-linear neighborhood selection steps. The CV based penalty parameters  $\lambda_{1,k}$  in linear neighborhood selection and  $\lambda_{2,k}$  in non-linear neighborhood selection were used for each replicate.

| $(\gamma, \alpha)$ | Truncated AUC (0.10) | Truncated AUC (0.40) | Non-truncated AUC |
|--------------------|----------------------|----------------------|-------------------|
| (0.20, 0.33)       | 0.832                | 0.908                | 0.928             |
| (0.20, 0.66)       | 0.850                | 0.911                | 0.929             |
| (0.20, 1.00)       | 0.847                | 0.916                | 0.934             |
| (1.00, 0.33)       | 0.802                | 0.881                | 0.910             |
| (1.00, 0.66)       | 0.811                | 0.876                | 0.900             |
| (1.00, 1.00)       | 0.810                | 0.880                | 0.901             |
| (2.00, 0.33)       | 0.747                | 0.848                | 0.873             |
| (2.00, 0.66)       | 0.748                | 0.837                | 0.864             |
| (2.00, 1.00)       | 0.762                | 0.840                | 0.869             |

38 It appears, that all parameter pairs  $(\gamma, \alpha)$  are capable of identifying correct  
 39 non-linear relationships efficiently – non-truncated AUCs are ranging between  
 40 0.864 and 0.928 (see the right column in Table S1). In particular, these results  
 41 suggest that the performance of the SNS procedure becomes slightly better with

42 smaller parameter  $\gamma$  values. We therefore recommend to use the value 0.20 for  
 43  $\gamma$  which is the smallest possible value that can be used in the exponential kernel  
 44 function (see e.g. Shi and Choi, 2011). The same conclusion has been also  
 45 made in Kontio and Sillanpää (2019) that focused on finding higher-order gene-  
 46 by-gene interaction terms using the exponential kernel function. However, for  
 47 each fixed value of  $\gamma \in \{1/5, 1, 2\}$  the SNS procedure shows extremely robust  
 48 performance with respect to the changes in  $\alpha$  parameter values. In fact, the  
 49 truncated and non-truncated AUCs produced by different  $\alpha$  values with fixed  $\gamma$   
 50 values are practically identical.

51 We have also found that for a fixed value of  $\gamma \in \{1/5, 1, 2\}$  the SNS procedure  
 52 is not sensitive to the choices of  $\alpha_1$  and  $\alpha_2$  even if they are different. For instance,  
 53 few examples are given in Table S2 with the  $\gamma$  parameter fixed to 0.20.

Table S2: Averaged areas under the truncated and non-truncated ROC curves (AUCs) for the SNS procedure with fixed  $\gamma$  value 0.20 and different parameter  $\alpha_1$  and  $\alpha_2$  values over ten replicates in the simulated scenarios. Here  $\alpha$  parameters used for linear and non-linear neighborhood selection steps are separated with symbols  $\alpha_1$  (linear) and  $\alpha_2$  (non-linear). Truncation points are set to 0.10 and 0.40 false-positive rates and shown in brackets above each corresponding column. The CV-based parameter  $\lambda_{1,k}$  and  $\lambda_{2,k}$  values were used for each replicate in both linear and non-linear estimation steps.

| $(\gamma, \alpha_1, \alpha_2)$ | Truncated AUC (0.10) | Truncated AUC (0.40) | Non-truncated AUC |
|--------------------------------|----------------------|----------------------|-------------------|
| (0.20, 0.33, 1.00)             | 0.835                | 0.908                | 0.931             |
| (0.20, 0.33, 0.66)             | 0.840                | 0.905                | 0.927             |
| (0.20, 0.66, 1.00)             | 0.837                | 0.905                | 0.926             |

54 Note that the selection of optimal tuning parameters is extremely challenging  
 55 task in general and is highly depending on the context. Especially, to same  
 56 extent that the optimal choice of  $(\gamma, \alpha)$  in some case is not necessarily the  
 57 optimal one in another case, neither might be the criteria by which they are  
 58 chosen. Considering this issue would be beyond the scope of this paper. In  
 59 particular, the above examples only illustrate that we would get decent results  
 60 even if the most optimal pair of  $(\gamma, \alpha)$  is not used.

## 61 2 Robustness with respect to the subsamples

62 Let us now evaluate the robustness of the SNS method under a series of different  
 63 subsamples to test if the results are sensitive to the small changes in data.  
 64 We select ten different subsamples among the original 191 individuals each of  
 65 which consisting of  $m$  randomly chosen individuals. Then we analyze the same  
 66 simulated dataset separately over each subsample to see how much the results  
 67 are differing from each other. The test dataset is chosen to be the first replicate  
 68 among the simulated datasets described in the previous example (this specific  
 69 dataset can be found in the supplementary materials B).

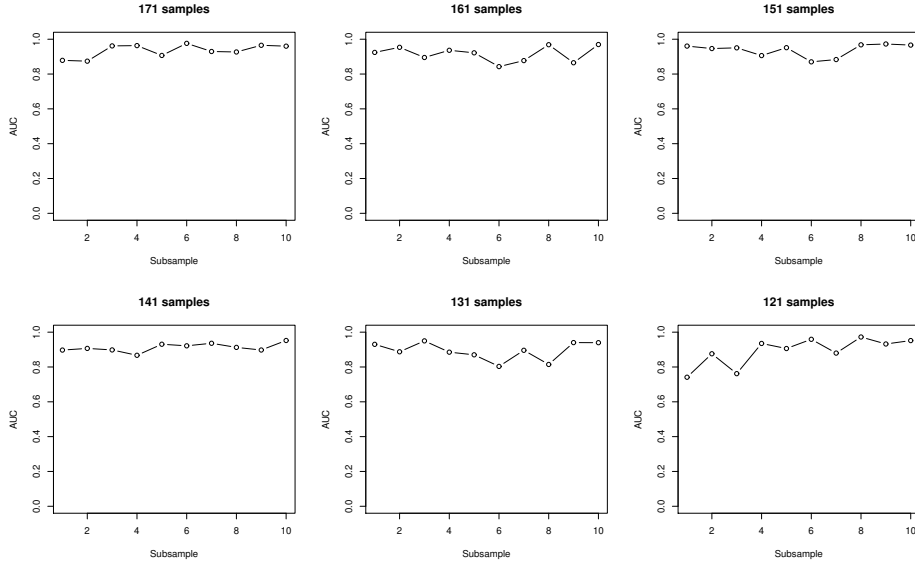

Figure S1: Non-truncated areas under the ROC curves (AUCs) over ten different randomly chosen subsamples for each subsample size 121, 131, 141, 151, 161 and 171. The non-linear neighborhoods were estimated with the SNS method using the parameter values  $\gamma = 0.20$ ,  $\alpha_1 = 1/3$  and  $\alpha_2 = 1$ . Here  $\alpha$  parameters used for linear and non-linear neighborhood selection steps are separated with symbols  $\alpha_1$  (linear) and  $\alpha_2$  (non-linear). The CV based penalty parameters  $\lambda_{1,k}$  in linear neighborhood selection and  $\lambda_{2,k}$  in non-linear neighborhood selection were used in each case.

70 This subsampling analysis is repeated for different subsample sizes  $m \in$   
71  $\{121, 131, 141, 151, 161, 171\}$ . In each case, the non-linear neighborhoods are es-  
72 timated with the SNS method using the parameters  $\gamma = 0.20$ ,  $\alpha_1 = 1/3$  and  
73  $\alpha_2 = 1$  as in the article. Similarly to the previous example, we only consider  
74 and estimate the neighborhoods around simulated proteins  $(Z_1, Z_2, Z_3, Z_4, Z_5)$   
75 as the corresponding true neighborhoods are known.

76 The non-truncated AUCs over ten randomly chosen subsamples are dis-  
77 played in the Figure S1. Each plot corresponds to a different subsample size  
78  $m \in \{121, 131, 141, 151, 161, 171\}$ . As we can see, the non-truncated AUCs are  
79 scattered around 0.90 with small variances in the majority of cases. Averaged  
80 AUCs over different subsamples are 0.891, 0.892, 0.912, 0.938, 0.915 and 0.934  
81 for sample sizes 121, 131, 141, 151, 161 and 171, respectively. It is evident that  
82 the SNS procedure captures the underlying signals concordantly even though  
83 randomness in data changes extensively. Only with the subsample size of 121,  
84 AUCs begin to be slightly more dispersed over subsamples. However, while  
85 the sample size of 121 is extremely low to capture non-linear relationships the  
86 performance of the SNS method is surprisingly robust over the subsamples.

87 **3 Additional figures**

88 Here we provide additional information regarding the results shown in Table  
 89 2 in the article. In Figure S2, we have plotted sensitivities against specificities  
 90 separately in each replicate (ten replicates) for the SNS method and the best  
 91 performing versions of both DC and MI based methods (DC-REL and MI-REL).

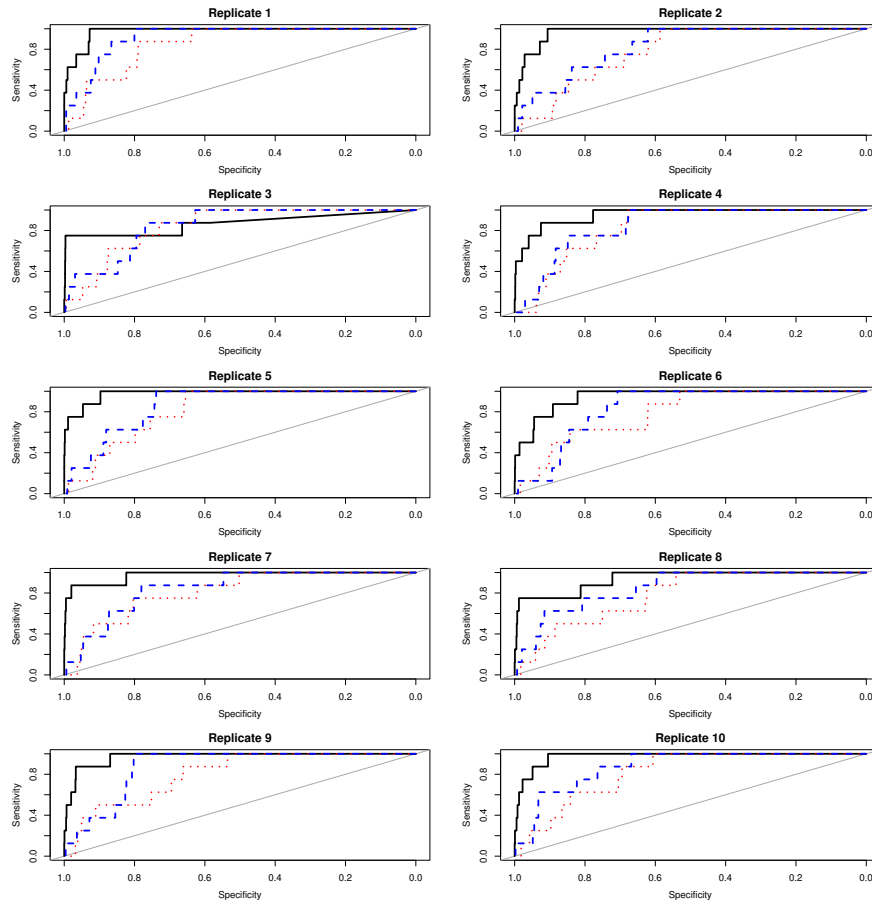

Figure S2: The receiver operator characteristic curves plotted for the SNS (black solid lines), DC-REL (blue dashed lines) and MI-REL (red dotted lines) methods in each ten replicate. In the SNS method, the CV-based parameter  $\lambda_{1,k}$  and  $\lambda_{2,k}$  values were used for each replicate in both linear (with  $\alpha_1 = 1/3$ ) and non-linear (with  $\alpha_2 = 1$ ) estimation steps.

92 It is evident that in each replicate the proposed SNS method consistently  
 93 implies better accuracy than the best versions of the MI and DC based methods.

94 **3.1 Yeast knock-out gene expression data**

95 Figure S3 shows the GRNs estimated using the REL-MI and REL-DC methods  
 96 on the DREAM3 yeast knock-out data we are referring in the article. These  
 results are also presented in the paper of Guo *et al.* (2014).

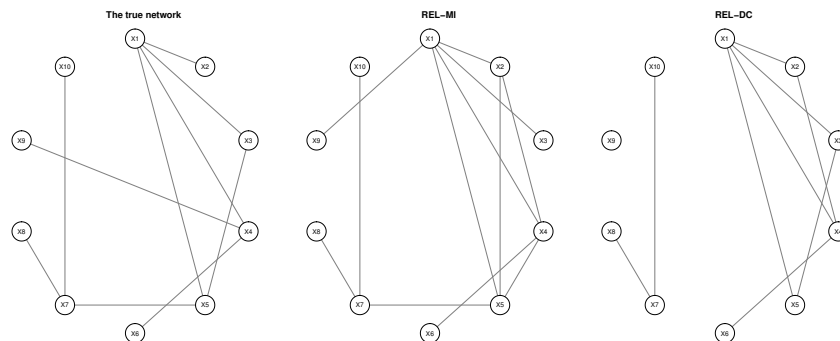

Figure S3: The true network and the network structures estimated with the REL-MI and REL-DC methods.

97

98 **References**

99 [1] Friedman J., T. Hastie, and R. Tibshirani, 2010 Regularization paths for  
 100 generalized linear models via coordinate descent. *J. Stat. Softw.* **33**: 1-22.

101 [2] Guo, X., Y. Zhang, W. Hu, H. Tan, and X. Wang, 2014 Inferring nonlin-  
 102 ear gene regulatory networks from gene expression data based on distance  
 103 correlation. *PLOS ONE* **9**: 1-7.

104 [3] Kontio J. A. J. and M. J. Sillanpää, 2019 Scalable nonparametric pre-  
 105 screening method for searching higher-order genetic interactions underlying  
 106 quantitative traits. *Genetics* **213**: 1209-1224.

107 [4] Noren, D. P., B. L. Long, R. Norel, K. Rhissorrakrai, K. Hess *et*  
 108 *al.*, 2016 A crowdsourcing approach to developing and assessing predic-  
 109 tion algorithms for AML prognosis. *PLoS Comput. Biol.* **12**: e1004890  
 110 <https://doi.org/10.1371/journal.pcbi.1004890>.

111 [5] Shi, J. Q., and T. Choi, 2011 *Gaussian Process Regression Analysis for*  
 112 *Functional Data*. Chapman Hall/CRC, London.

113 [6] Zou, H., and T. Hastie, 2005 Regularization and variable selection via the  
 114 elastic net. *J. R. Stat. Soc. B.* **67**: 301-320.
